# Supplementary material for: Kinetics of manganese leaching from an iron-rich manganese dioxide ore with bagasse pith as a reductant
Source: Royal Society of Chemistry journal article supplement (doi:10.1039/c8nj03875a), 2018-01-01
Supplement: c8nj03875a1.pdf [file c8nj03875a1.pdf]

## Kinetics of Manganese Leaching from Iron-Rich Manganese Dioxide Ore with Bagasse Pith as Reductant

Jiaqiao Gan<sup>a</sup>, Jingxian Cui<sup>a</sup>, Yaseen Muhammad<sup>a,b</sup>, Xueping Li<sup>a</sup>, Yuhong Wang<sup>a</sup>, Haifeng Su<sup>a\*</sup>

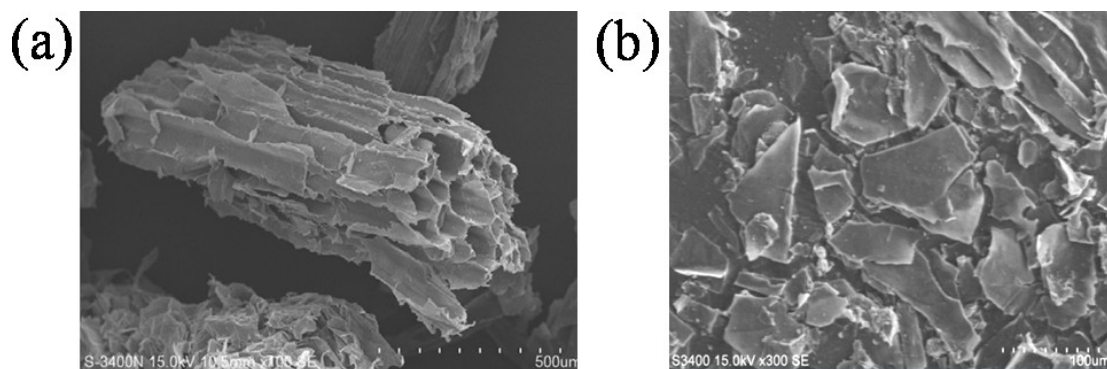

**Fig. S1** SEM micrographs for bagasse pith  
a) raw bagasse pith; b) after acid-leaching treatment.
